# Supplementary material
Source: PubMed Central journal article supplement (PMC2117866)
Supplement: jnnpsyc_78_9_984__1.pdf [file jnnpsyc_78_9_984__1.pdf]

A

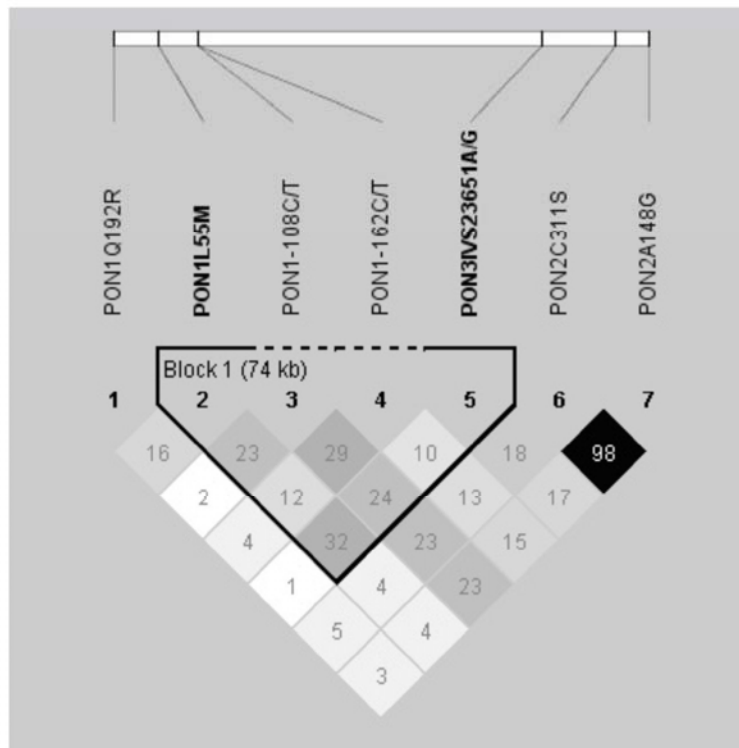

B

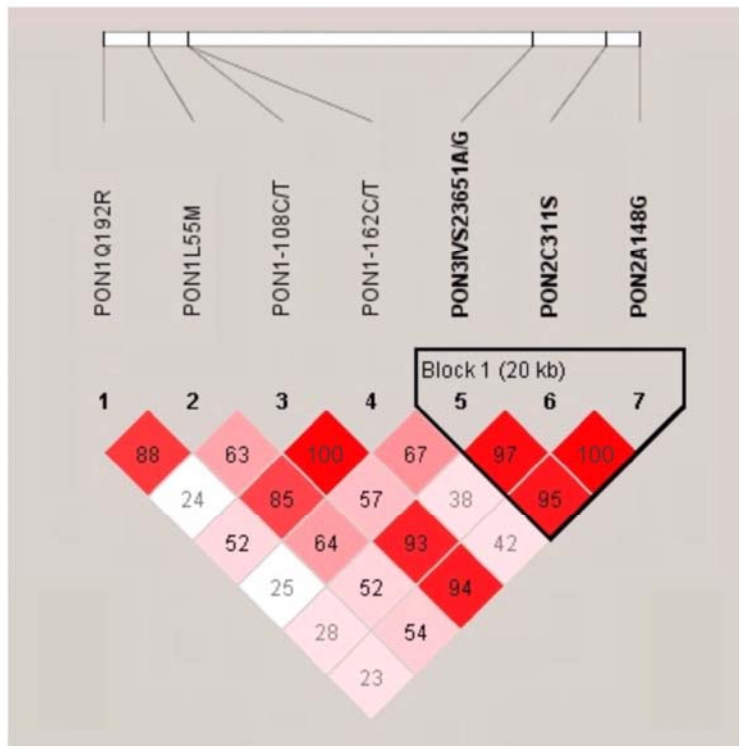

Supplementary Figure. Haploview plots of pairwise LD across the PON gene cluster. Panel A shows values for  $r^2 \times 100$ . The two-locus haploblock comprising SNPs 2 and 5 shows low correlation ( $r^2=0.32$ ). Panel B shows values for  $D' \times 100$ . A block of high LD across PON2 and PON3 is illustrated.
